# Supplementary material for: A parsimonious model of longitudinal stream DOC patterns based on groundwater inputs and in-stream uptake
Source: Copernicus journal article supplement (doi:10.5194/hess-2021-358), 2021-07-28
Supplement: Supplementary file 1 [file hess-2021-358-supplement.pdf]

# Supplementary information

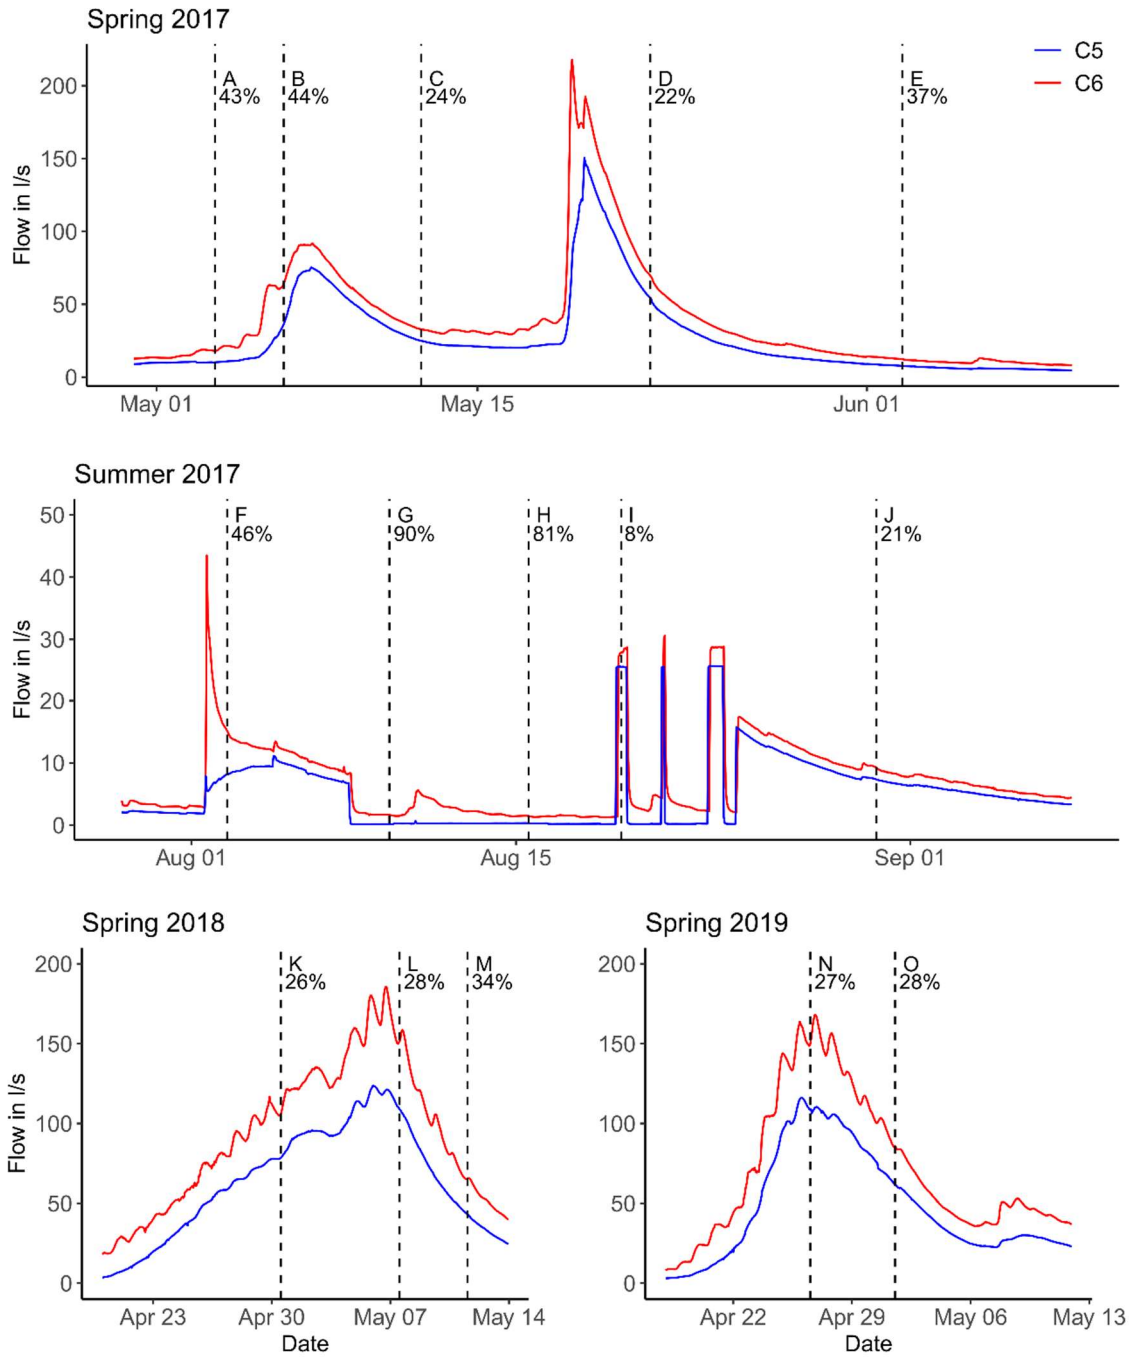

Figure S1 Hydrographs of hydrometric stations C5 (blue) and C6 (red). Each panel shows hydrographs by season and year. The vertical dashed lines and letters correspond to the 15 samplings. The percentages indicate the net gain in streamflow between C5 and C6 for that day.

5

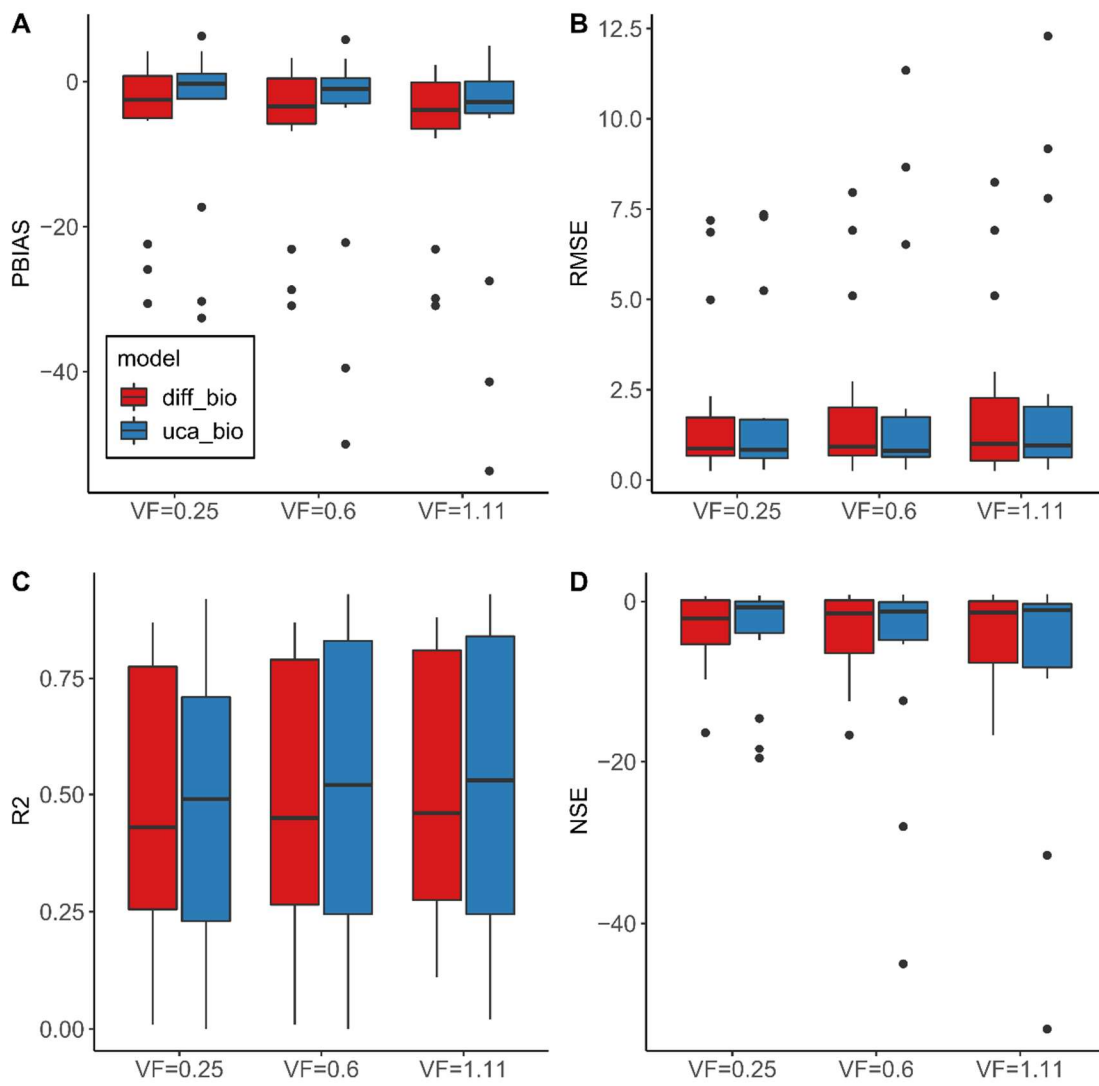

**Figure S2** Goodness of fit metrics for different values of Vf. Panel A, B, C, D show PBIAS, RMSE, R<sup>2</sup>, and NSE, respectively. The boxplots show simulations for all fifteen samplings together. The models “DIFF\_BIO” and “UCA\_BIO” are presented in red and blue.
